# Supplementary material for: MALDI TOF Mass Spectrometry Imaging of Blood Smear: Method Development and Evaluation
Source: Int J Mol Sci. 2021 Jan 8;22(2):585. doi: 10.3390/ijms22020585 (PMC7827909; doi:10.3390/ijms22020585)
Supplement: Supplementary file 1 [file ijms-22-00585-s001.xlsx]

## Sheet: Figure S1
Figure S1. Matrix deposition conditions for D1 instrumental settings
Sublimation/min	(+) %Heme (70°C; 105s)	(+) %IMP (70°C; 105 s)	(+) %Heme (37°C; 5 min)	(+) %IMP (37°C; 5 min)	(-) %Heme (70°C; 105s)	(-) %ATP (70°C; 105 s)	(-) %Heme (37°C; 5 min)	(-) %ATP (37°C; 5 min)
3	35.84	2.615	29.06	1.68	77.15	52.8475	86.26	13.105
5	55.47	2.84	13.66	1.845	88.785	10.19	88.58	2.275
8	7.67	0.7	4.075	1.37	66.335	3.325	71.88	0.325
3 and 5 min depositions are better than any 8 min deposition.
5 min deposition accompanied by recrystalization on 70°C lasting 105 s provides equal or better signal intensities then any 3 min deposition procedure.
CONDITIONS:
Sample Prep:
5 s 96% EtOH
iMScope:
D1 14% Int; Pitch: 9-7; 30 Shot; 40 Hz; Source Volt 3.5 kV; Detect. 1.9 kV
Both polarities m/z: 200 - 600;600 - 900
Negative ionization: ATP [M-H]- 505.988
HEME 616.170
Positive ionization: IMP + Na 371.0363
HEME 616.177

## Sheet: Figure S2
Figure S2. Laser intensity for CHCA matrix
Figure S2. (a) Laser D0 conditions					Figure S2. (b) Laser D1 conditions
%INT D0	Heme %	CrP %	Creatine Phosphate		%INT D1	Heme %	IMP %
10	1.035	6.5	IMP signals were very weak.		14	40.43	2.01
11	1.235	15.315			15	34.22	2.67
12	0.86	11.73			16	42.97	2.225
13	0.835	9.49			17	44.255	1.795
14	0.74	9.4			18	45.85	1.53
15	1.075	7.52			19	46.04	1.645
16	0.245	7.265			20	48.045	2.235
17	0.835	6.24			21	42.275	1.66
18	0.4	6.685			22	44.235	1.845
					23	49.335	1.625
Sample Prep:
5 s 96% EtOH; 5 min CHCA, 105 s 70 C recrystalization; 2 biological replicates					Sample Prep:
					5 s 96% EtOH; 5 min CHCA, 105 s 70 C recrystalization; 2 biological replicates
iMScope:
D0: Pitch: 7-6; 50 Shot; 100 Hz; Source Volt 3.5 kV; Detect. 1.9 kV					iMScope:
m/z: 200 - 600;600 - 900					D1: Pitch: 9-7; 30 Shot; 40 Hz; Source Volt. 3.5 kV; Detect. Volt. 1.9 kV
					m/z: 200 - 600;600 - 900
Optimum LASER intensity: 11-12 %
					Rise in LASER intensity slowly increases heme signal and slowly decreases IMP intensity: in order to reduce the LASER spot ovrelap 14% intensity will be used.

## Sheet: Figure S3
Figure S3. Laser intensity for 9AA matrix
Figure S3. (a) Laser D0 conditions									Figure S3. (b) Laser D1 conditions
%INT D0	ATP %	Heme %							%INT D1	ATP %	Heme %
10	4.045	11.34							14	7.58	68.095
11	2.82	4.065							15	8.675	90.68
12	3.65	4.655							16	3.93	86.745
13	4.85	8.705							17	3.89	85.005
14	3.695	3.285							18	6.055	90.195
15	3.145	0							19	5.855	100
16	2.17	0							20	7.43	100
17	1.425	6.295							21	3.04	100
18	3.065	2.69							22	6.06	100
									23	8.82	100
Sample Prep:									Sample Prep:
5 s 96% EtOH; 5 min CHCA, 105 s 70 C recrystalization; 2 biological replicates									5 s 96% EtOH; 5 min CHCA, 105 s 70 C recrystalization; 2 biological replicates
iMScope:									iMScope:
D0: Pitch: 7-6; 3.0 kV; 1.9 kV; 50 Shot; 100 Hz									D1: Pitch: 9-7; 30 Shot; 40 Hz; Source Volt. 3.0 kV; Detector Volt. 1.9 kV
m/z: 200 - 600;600 - 900									m/z: 200 - 600;600 - 900
Optimum LASER intensity: 10-13 %									Rise in LASER intensity slowly increases heme signal while there is no change in ATP intensity: in order to reduce the LASER spot ovrelap 14% intensity will be used.

## Sheet: Figure S4
Figure S4. Laser pitch size for D0 settings
Pitch x,y/um	Pitch diameter/um	(+) %Heme (70°C; 105s)	(+) %IMP (70°C; 105 s)	(-) %Heme (70°C; 105s)	(-) %ATP (70°C; 105 s)
6.0,5.0	7.81025	0.3	0.395	0	6.49
6.5,5.5	8.51469	0.57	0.2	0	13.03
7.0,6.0	9.21954	0.17	0	0	6.405
7.5,6.5	9.92472	0.55	0.1	0	5.085
8.0,7.0	10.6301	0.695	0.375	8.575	5.71
Sample Prep:
5 s 96% EtOH; 5 min CHCA, 105 s 70 C recrystalization; 2 biological replicates
iMScope:
D0: LASER 12% Int; 50 Shot; 100 Hz; Source Volt. 3.0/3.5 kV; Detect. Volt. 1.9 kV
m/z: 200 - 600;600 - 900
Optimum LASER pitch: 8;7 um

## Sheet: Figure S5
Figure S5. Laser pitch size for D1 settings
Pitch x,y/um	Pitch diameter/um	(+) %Heme (70°C; 105s)	(+) %IMP (70°C; 105 s)	(-) %Heme (70°C; 105s)	(-) %ATP (70°C; 105 s)
8,6	10	52.97	2.79	76.33	12.255
9,7	11.4018	39.565	1.375	76.535	10.685
10,8	12.8062	27.33	1.347	88.885	12.275
11,9	14.2127	20.855	1.255	97.555	15.31
12,10	15.6205	22.565	0.51	89.71	11.605
13,11	17.0294	21.135	2.755	100	9.025
14,12	18.4391	19.96	0.475	100	7.855
Sample Prep:
5 s 96% EtOH; 5 min CHCA, 105 s 70 C recrystalization; 2 biological replicates
iMScope:
D1: LASER Int 14%; 30 Shot; 40 Hz; Source. Volt. 3.0/3.5 kV; Detect. Volt. 1.9 kV
m/z: 200 - 600;600 - 900
Selected LASER pitch: 8;6 um.
